# Supplementary material for: Predictors of working days lost due to sickness absence and disability pension
Source: Springer Nature journal article supplement (doi:10.1007/s00420-020-01630-6), 2021-01-12
Supplement: MOESM1 [file 18761684]

## **Supplementary material**

### **Predictors of working days lost due to sickness absence and disability pension**

Rahman Shiri,<sup>1</sup> Aapo Hiilamo,<sup>1</sup> Ossi Rahkonen,<sup>2</sup> Suzan JW Robroek,<sup>3</sup> Olli Pietiläinen,<sup>2</sup> Tea Lallukka<sup>1,2</sup>

<sup>1</sup> Finnish Institute of Occupational Health, Helsinki, Finland

<sup>2</sup> Department of Public Health, University of Helsinki, Helsinki, Finland

<sup>3</sup> Department of Public Health, Erasmus Medical Center Rotterdam, Rotterdam, Netherlands

**Table S1:** Complete case analysis of average number of days lost due to sickness absence and disability pension and gender-adjusted incidence rate ratio (IRR) of total number of days lost due to sickness absence or disability pension according to background characteristics at baseline

| Characteristic                                   | N    | %    | Average number of days lost |                    | IRR  | 95% CI    |
|--------------------------------------------------|------|------|-----------------------------|--------------------|------|-----------|
|                                                  |      |      | Sickness absence            | Disability pension |      |           |
| Overall                                          | 1630 | 100  | 139                         | 179                |      |           |
| Gender                                           |      |      |                             |                    |      |           |
| Women                                            | 1327 | 81.4 | 147                         | 180                | 1    |           |
| Men                                              | 303  | 18.6 | 105                         | 171                | 0.92 | 0.77-1.10 |
| Education                                        |      |      |                             |                    |      |           |
| Elementary or middle school                      | 381  | 23.5 | 188                         | 286                | 1    |           |
| Vocational school or equivalent                  | 367  | 22.7 | 174                         | 242                | 0.84 | 0.68-1.03 |
| College or university degree                     | 871  | 53.8 | 103                         | 107                | 0.47 | 0.39-0.55 |
| Occupational class                               |      |      |                             |                    |      |           |
| Managers or professionals                        | 528  | 32.5 | 86                          | 102                | 1    |           |
| Semi-professionals                               | 290  | 17.9 | 130                         | 170                | 1.66 | 1.35-2.03 |
| Routine non-manual workers                       | 589  | 36.3 | 165                         | 186                | 1.88 | 1.58-2.24 |
| Manual workers                                   | 217  | 13.3 | 209                         | 360                | 2.96 | 2.36-3.71 |
| Smoking                                          |      |      |                             |                    |      |           |
| Never                                            | 921  | 56.9 | 125                         | 151                | 1    |           |
| Past                                             | 388  | 24.0 | 145                         | 183                | 1.22 | 1.02-1.45 |
| Current                                          | 309  | 19.1 | 173                         | 250                | 1.44 | 1.19-1.73 |
| Body mass index                                  |      |      |                             |                    |      |           |
| Normal                                           | 716  | 44.3 | 117                         | 143                | 1    |           |
| Overweight                                       | 602  | 37.2 | 143                         | 184                | 1.33 | 1.13-1.55 |
| Obesity                                          | 299  | 18.5 | 182                         | 250                | 1.63 | 1.34-1.98 |
| Leisure-time physical activity                   |      |      |                             |                    |      |           |
| Low                                              | 498  | 32.4 | 150                         | 215                | 1    |           |
| Moderate                                         | 701  | 45.6 | 142                         | 154                | 0.79 | 0.67-0.93 |
| Vigorous                                         | 339  | 22.0 | 123                         | 189                | 0.83 | 0.68-1.01 |
| Binge drinking (once a month or more)            |      |      |                             |                    |      |           |
| No                                               | 1273 | 79.9 | 135                         | 168                | 1    |           |
| Yes                                              | 321  | 20.1 | 154                         | 227                | 1.34 | 1.12-1.61 |
| Heavy lifting, or pulling or pushing heavy loads |      |      |                             |                    |      |           |
| No                                               | 1079 | 67.3 | 111                         | 112                | 1    |           |
| Yes                                              | 523  | 32.7 | 193                         | 305                | 2.22 | 1.91-2.58 |
| Back rotations                                   |      |      |                             |                    |      |           |
| No                                               | 915  | 57.0 | 109                         | 114                | 1    |           |
| Yes                                              | 689  | 43.0 | 177                         | 260                | 1.99 | 1.72-2.30 |
| Awkward working positions                        |      |      |                             |                    |      |           |

| Characteristic                             | N    | %    | Average number of days lost |                    | IRR  | 95% CI    |
|--------------------------------------------|------|------|-----------------------------|--------------------|------|-----------|
|                                            |      |      | Sickness absence            | Disability pension |      |           |
| No                                         | 804  | 50.2 | 106                         | 112                | 1    |           |
| Yes                                        | 798  | 49.8 | 170                         | 239                | 2.03 | 1.75-2.34 |
| <b>Job strain</b>                          |      |      |                             |                    |      |           |
| No                                         | 1201 | 74.5 | 133                         | 161                | 1    |           |
| Yes                                        | 412  | 25.5 | 157                         | 225                | 1.35 | 1.15-1.59 |
| <b>Long-standing illness</b>               |      |      |                             |                    |      |           |
| No                                         | 954  | 60.8 | 104                         | 97                 | 1    |           |
| Yes, not limiting work or daily activities | 226  | 14.4 | 130                         | 97                 | 1.15 | 0.94-1.41 |
| Yes, limiting work or daily activities     | 389  | 24.8 | 220                         | 423                | 3.33 | 2.83-3.93 |
| <b>Common mental disorder</b>              |      |      |                             |                    |      |           |
| No                                         | 1204 | 74.2 | 126                         | 123                | 1    |           |
| Yes                                        | 418  | 25.8 | 175                         | 331                | 1.98 | 1.68-2.32 |
| <b>Number of pain sites</b>                |      |      |                             |                    |      |           |
| None                                       | 799  | 53.1 | 100                         | 89                 | 1    |           |
| One                                        | 341  | 22.7 | 142                         | 165                | 1.70 | 1.42-2.03 |
| Two or more                                | 364  | 24.2 | 209                         | 350                | 2.98 | 2.50-3.55 |

**Table S2:** Full model incidence rate ratio (IRR) of days lost due to sickness absence or disability pension according to background characteristics at baseline in men

| Characteristic                               | IRR  | 95% CI    |
|----------------------------------------------|------|-----------|
| Smoking (ref: never)                         |      |           |
| Past                                         | 1.13 | 0.75-1.70 |
| Current                                      | 2.16 | 1.32-3.54 |
| Body mass index (ref: normal)                |      |           |
| Overweight                                   | 1.66 | 1.12-2.46 |
| Obesity                                      | 0.81 | 0.47-1.39 |
| Binge drinking (once a month or more vs. no) | 1.32 | 0.91-1.91 |
| Back rotations                               | 2.06 | 1.08-3.92 |
| Awkward working positions                    | 0.55 | 0.30-1.01 |
| Long-standing illness (ref: no)              |      |           |
| Yes, not limiting work or daily activities   | 1.38 | 0.80-2.38 |
| Yes, limiting work or daily activities       | 2.67 | 1.61-4.41 |
| Common mental disorder                       | 1.48 | 0.95-2.30 |
| Number of pain sites (ref: none)             |      |           |
| One                                          | 0.80 | 0.38-1.65 |
| Two or more                                  | 2.60 | 1.45-4.65 |
